# Supplementary figures and images for: Dexamethasone sodium phosphate intercalated layered double hydroxides and their therapeutic efficacy in a murine asthma model
Source: Royal Society of Chemistry journal article supplement (doi:10.1039/c4ra09977j), 2015-01-01

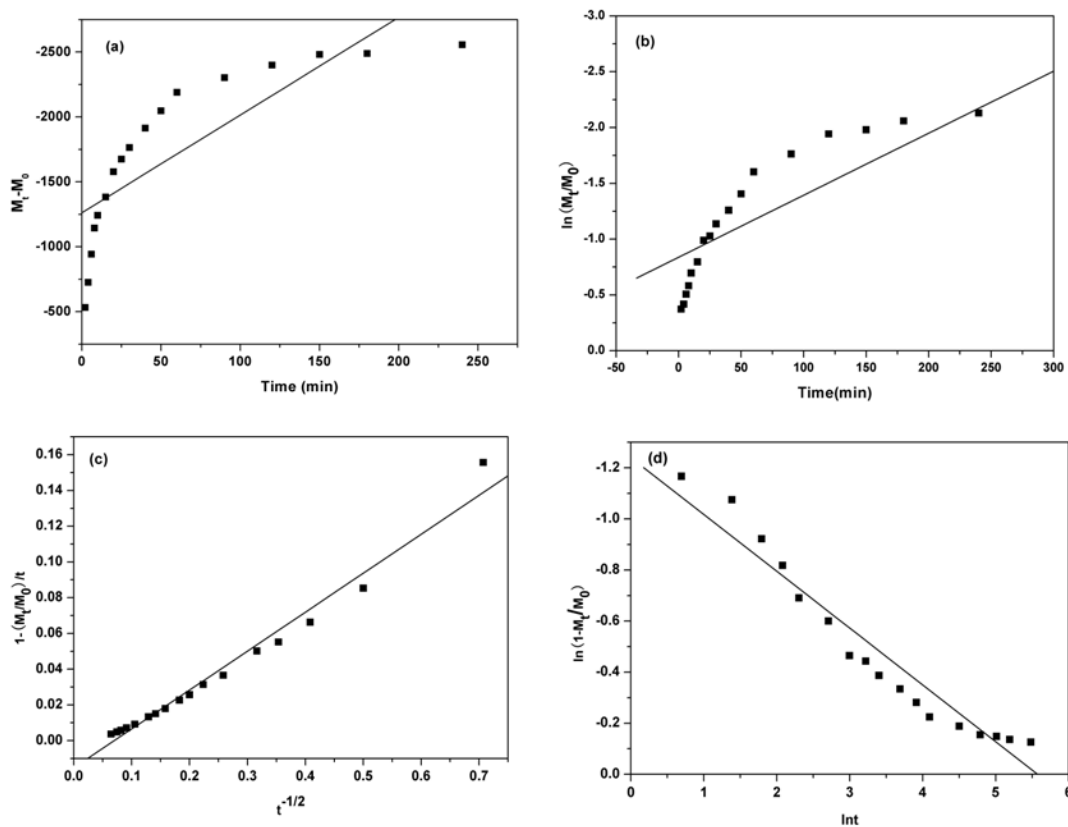

Fig.S1. Plots of four different kinetic models for the release of dexa from Dexa-LDHs at pH=7.4

Supplement: c4ra09977j1.pdf [file c4ra09977j1.pdf]
